# Supplementary material
Source: MDPI journal article supplement (https://www.mdpi.com/2079-9268/1/1/20)
Supplement: s1 [file s1]

*Correction*

## **A Review and Modern Approach to LC Ladder Synthesis**

**Alexander J. Casson <sup>\*</sup> and Esther Rodriguez-Villegas**

Circuits and Systems Research Group, Electrical and Electronic Engineering Department,  
Imperial College London, SW7 2AZ, UK

*Published: 13 April 2011*

---

A new version of the paper [1] was uploaded today. We found that in Section 3.1, Equation (17) and the sentence preceding it should be:

Considering case (b) (case (a) is similar but in terms of the  $z$  parameters) the input voltage to output transfer function is given by

$$A(s) = \frac{y_{12}}{R_s y_{11} + 1} \quad (1)$$

We would like to apologize for any inconvenience caused to our readers.

*J. Low Power Electron. Appl.* Editorial Office

### **References**

1. Casson, A.J.; Rodriguez-Villegas, E. A Review and Modern Approach to LC Ladder Synthesis. *J. Low Power Electron. Appl.* **2011**, *1*, 20–44.

© 2011 by the authors; licensee MDPI, Basel, Switzerland. This article is an open access article distributed under the terms and conditions of the Creative Commons Attribution license (<http://creativecommons.org/licenses/by/3.0/>).
